# Supplementary material
Source: publisher figshare collection journal article supplement (https://karger.figshare.com/articles/dataset/_/5121400)
Supplement: Supplementary file 1 [file 1]

Argast et al.

Supplemental Table 1: Ligands and concentrations used in EMT model screen

| Ligand          | Concentration | Source             | Catalog #   |
|-----------------|---------------|--------------------|-------------|
| Amphiregulin    | 100ng/ml      | R&D Systems        | 262-AR      |
| Angiopoietin 2  | 400 ng/ml     | R&D Systems        | 623-AN-025  |
| BMP4            | 100 ng/ml     | R&D Systems        | 314BP/CF    |
| BMP7            | 100 ng/ml     | R&D Systems        | 354BP/CF    |
| CNTF            | 25 ng/mL      | Peprotech          | 450-13      |
| Collagen-I      | 5 µg/cm2      | Sigma              | C8919       |
| Collagen-IV     | 5 µg/cm2      | Biochemika         | 27663       |
| CTGF            | 20 ng/ml      | Peprotech          | 120-19      |
| Desert Hedgehog | 10ug/ml       | R&D Systems        | 4777-DH     |
| EGF             | 100 ng/ml     | R&D Systems        | 236-EG      |
| Endothelin 1    | 100 nM        | Bachem             | H6995       |
| FGF1            | 10 ng/ml      | R&D Systems        | 232FA/CF    |
| FGF2            | 10 ng/ml      | R&D Systems        | 234FSE/CF   |
| Fibronectin     | 1 µg/cm2      | Invitrogen (Gibco) | 33010-018   |
| Fulvestrant     | 1µM           | Sigma              | I4409       |
| G-CSF           | 50 ng/ml      | Genscript          | Z00342      |
| GM-CSF          | 25 ng/ml      | Genscript          | Z00349      |
| HGF             | 100 ng/ml     | Peprotech          | 100-39      |
| HMG B1          | 50 ng/ml      | R&D Systems        | 1690-HM-025 |
| IFN gamma       | 50 ng/ml      | Peprotech          | 300-02      |
| IGF-1           | 50 ng/ml      | R&D Systems        | 291-G1      |
| IGF2            | 100 ng/ml     | R&D Systems        | 292-G2      |
| IL-11           | 100ng/ml      | Peprotech          | 200-11      |
| IL-1alpha       | 10 ng/ml      | Peprotech          | 200-1A      |
| IL1beta         | 2.5 ng/ml     | R&D Systems        | 201-LB      |
| IL-31           | 50 ng/ml      | Peprotech          | 200-31      |
| IL-33           | 50 ng/ml      | Peprotech          | 200-33      |
| IL6             | 2 ng/ml       | Peprotech          | 200-06      |
| IL8             | 0.5 ng/ml     | R&D Systems        | 208-IL      |
| Indian Hedgehog | 3ug/ml        | R&D Systems        | 1705-HH     |
| Laminin-I       | 1 µg/cm2      | Sigma              | L2020       |
| LIF             | 20 ng/ml      | Genscript          | Z00384      |
| LPA             | 10 µM         | Biomol             | LP-100      |
| M CSF           | 50 ng/ml      | Genscript          | Z02001      |
| MCP1            | 50 ng/ml      | Peprotech          | 300-04      |
| MSP             | 100 ng/ml     | R&D Systems        | 352-MS      |
| NRG1            | 50 ng/ml      | R&D Systems        | 377-HB/CF   |
| Oncostatin M    | 100 ng/ml     | R&D Systems        | 295OM/CF    |
| PAR1            | 100µM         | Anaspec            | 61530       |
| PAR2            | 100µM         | Anaspec            | 60217-1     |
| PAR4            | 100µM         | Anaspec            | 60218-1     |
| PDGF AA         | 50 ng/ml      | R&D Systems        | 221-AA      |
| PDGF BB         | 30 ng/ml      | R&D Systems        | 220-BB      |
| Pleiotrophin    | 25 ng/ml      | Peprotech          | 450-15      |
| Polylysine      | 100 mg/ml     | Sigma              | P4832       |
| Prolactin       | 100 ng/ml     | Peprotech          | 100-07      |
| PTHrP           | 50 ng/ml      | Peprotech          | 100-09      |
| S1P             | 1 µM          | Sigma              | S9666       |
| SDF-1alpha      | 100 ng/ml     | Sigma              | S190        |
| sIL6R           | 250 ng/ml     | Peprotech          | 200-06R     |

|                |                        |                 |           |
|----------------|------------------------|-----------------|-----------|
| Sonic Hedgehog | 100 ng/ml              | R&D Systems     | 1314-SH   |
| TGFbeta3       | 2µM                    | Made internally |           |
| TGFbeta1       | 2.5 ng/ml              | Calbiochem      | 616450    |
| TNFalpha       | 25 ng/ml               | R&D Systems     | 210-TA    |
| Trance         | 50 ng/ml               | R&D Systems     | 390-TN/CF |
| Vitronectin    | 0.1 µg/cm <sup>2</sup> | Sigma           | V8379     |
| WISP1          | 20 ng/ml               | Peptrotech      | 120-18    |
| Wnt1           | 5 ng/ml                | Cell Sciences   | CRW001B   |
| Wnt3a          | 100 ng/ml              | R&D Systems     | 5036-WN   |
| Wnt5a          | 200 ng/ml              | R&D Systems     | 645-WN    |

Argast et al.

*Supplemental Table 2:* Densitometry of Figure 4 CFPAC1 immunoblots: Impact of pathway inhibition on ligand-induced fold changes to E-cadherin and vimentin, relative to Untreated/DMSO

| CFPAC1          |       | E-cadherin | Vimentin |
|-----------------|-------|------------|----------|
| UNT             | DMSO  | -          | -        |
|                 | JAKi  | -1.6       | -4.7     |
|                 | PI3Ki | -1.9       | 1.1      |
| HGF             | DMSO  | -3.2       | 3.0      |
|                 | JAKi  | -2.2       | 2.0      |
|                 | PI3Ki | -6.2       | 1.9      |
| OSM             | DMSO  | -6.7       | -1.2     |
|                 | JAKi  | -1.9       | -3.5     |
|                 | PI3Ki | -21.8      | -1.2     |
| HGF+<br>OSM     | DMSO  | -27.5      | 2.6      |
|                 | JAKi  | -4.4       | 2.4      |
|                 | PI3Ki | -86.3      | 2.2      |
|                 |       | E-cadherin | Vimentin |
| UNT             | DMSO  | -          | -        |
|                 | MEKi  | 1.1        | -1.3     |
| HGF             | DMSO  | -1.5       | 14.1     |
|                 | MEKi  | -1.5       | 4.4      |
| OSM             | DMSO  | -2.8       | 2.0      |
|                 | MEKi  | -4.5       | 1.8      |
| HGF<br>+<br>OSM | DMSO  | -2.3       | 16.9     |
|                 | MEKi  | -13.0      | 4.9      |

Argast et al.

*Supplemental Table 3:* Densitometry of Figure 4 H358 immunoblots: Impact of pathway inhibition on ligand-induced fold changes to E-cadherin and vimentin relative to Untreated/DMSO

| H358      |       | E-cadherin | Vimentin |
|-----------|-------|------------|----------|
| Untreated | DMSO  | -          | -        |
|           | JAKi  | -2.1       | BLD*     |
|           | MEKi  | -1.1       | BLD      |
|           | PI3Ki | -1.3       | BLD      |
| HGF       | DMSO  | -1.7       | 4.9      |
|           | JAKi  | -2.5       | 3.5      |
|           | MEKi  | -1.2       | 12.4     |
|           | PI3Ki | -2         | 12.7     |
| OSM       | DMSO  | -1.9       | 3.9      |
|           | JAKi  | -1         | BLD      |
|           | MEKi  | -1.3       | 14.9     |
|           | PI3Ki | -2         | BLD      |
| TGFB      | DMSO  | -2.4       | 44.6     |
|           | JAKi  | -1.7       | 50.3     |
|           | MEKi  | -3.1       | 60.9     |
|           | PI3Ki | -3.8       | 54.3     |
| HGF+ OSM  | DMSO  | -17.5      | 33.6     |
|           | JAKi  | -1.6       | 33       |
|           | MEKi  | -11.4      | 44.7     |
|           | PI3Ki | -4.3       | 35.7     |
| OSM+ TGFB | DMSO  | -70.1      | 43.3     |
|           | JAKi  | -3.1       | 45.8     |
|           | MEKi  | -27.7      | 58       |
|           | PI3Ki | -241       | 69.5     |

\*Below the level of detection

Argast et al.

*Supplemental Table 4:* Densitometry of Figure 4 H1650 immunoblots: Impact of pathway inhibition on ligand-induced fold changes to E-cadherin and vimentin relative to Untreated/DMSO

| H1650        |       | E-cadherin | Vimentin | Zeb1 |
|--------------|-------|------------|----------|------|
| UNT          | DMSO  | -          | -        | -    |
|              | JAKi  | 1.0        | BLD      | BLD* |
|              | MEKi  | 1.1        | BLD      | BLD  |
|              | PI3Ki | -1.4       | BLD      | BLD  |
| OSM          | DMSO  | -2.3       | 8.0      | 3.7  |
|              | JAKi  | 1.1        | 1.1      | 1.5  |
|              | MEKi  | -1.9       | 2.2      | 9.7  |
|              | PI3Ki | -1.2       | 5.1      | 3.8  |
| HGF +<br>OSM | DMSO  | -2.4       | 151.0    | 42.4 |
|              | JAKi  | 1.3        | 16.2     | 6.8  |
|              | MEKi  | -3.4       | 76.6     | 31.9 |
|              | PI3Ki | -1.2       | 13.4     | 19.9 |
| OSM+<br>TGFB | DMSO  | -2.2       | 54.6     | 25.2 |
|              | JAKi  | 1.3        | 1.9      | 1.6  |
|              | MEKi  | -3.2       | 29.1     | 20.6 |
|              | PI3Ki | -1.8       | 34.7     | 12.5 |

\*Below the level of detection
