# Supplementary material
Source: publisher figshare collection journal article supplement (https://karger.figshare.com/articles/dataset/_/5121400)
Supplement: Supplementary file 2 [file 1]

**Argast et al.**

**OSM-, HGF- and TGF $\beta$ -induced EMT in tumor models**

**Table Headings:**

*Supplemental Table 1:* Ligands and concentrations used in EMT model screen

*Supplemental Table 2:* Densitometry Densitometry of Figure 4 CFPAC1 immunoblots: Impact of pathway inhibition on ligand-induced fold changes to E-cadherin and vimentin, relative to Untreated/DMSO

*Supplemental Table 3:* Densitometry of Figure 4 H358 immunoblots: Impact of pathway inhibition on ligand-induced fold changes to E-cadherin and vimentin relative to Untreated/DMSO

*Supplemental Table 4:* Densitometry of Figure 4 H1650 immunoblots: Impact of pathway inhibition on ligand-induced fold changes to E-cadherin and vimentin relative to Untreated/DMSO

**Supplemental Figure Legends:**

*Supplemental Figure 1: Control of EMT morphological changes by the MEK, JAK and PI3K pathways.* (A) Pharmacological inhibition of JAK, MEK and PI3K pathways. CFPAC1 cells were pretreated with inhibitor for 2 hours, stimulated with ligand for 15 minutes, and lysed. Immunoblots were run to detect the indicated phosphorylated and total proteins to verify inhibition of each pathway at the concentration of inhibitor used. (B) Cells were treated with ligand for 7 days with and without the indicated inhibitors. On day 7 the cells were photographed under phase contrast with 10X objective to show morphological differences. DMSO controls are shown for each individual experiment. Scale bar is 0.2 mm.

*Supplemental Figure 2: Ligand driven EMT is reversible.* H358 cells were grown in the presence of ligand for 7 days. (A) Ligands were washed out on day 7 (T0), and reversion of morphological features was monitored in phase contrast photographs taken with 10X objective on the indicated day after ligand withdrawal. Scale bar is 0.2 mm. (B) Cells were fixed on the indicated day, stained for E-cadherin (green) and vimentin (red), and visualized by confocal microscopy with 63X objective. Scale bar is 0.05 mm. (C) Reversion of markers and morphology in CFPAC1 model. Scale bar is 0.2 mm. (D) Reversion of markers and morphology in H1650 model. Scale bar is 0.2 mm.
