# Supplementary material
Source: publisher figshare collection journal article supplement (https://karger.figshare.com/articles/dataset/_/5121400)

## CFPAC1

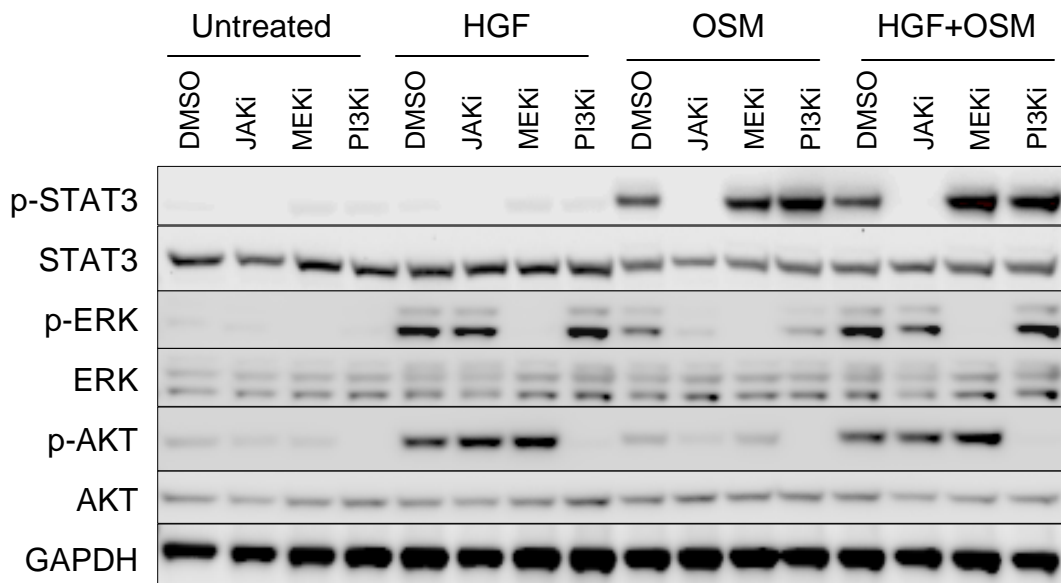

**CFPAC1**

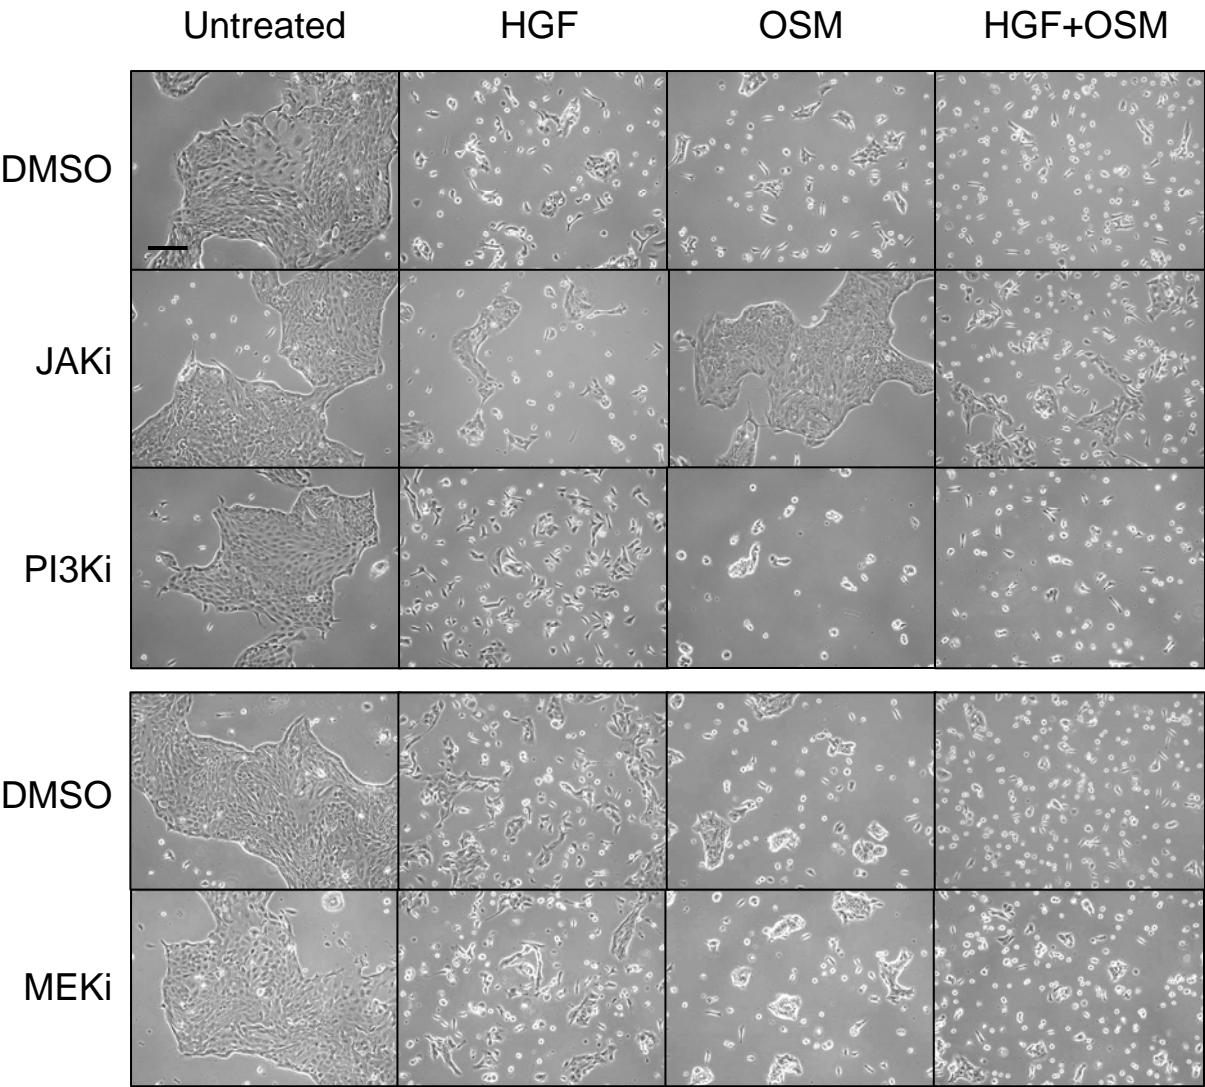

Argast et al.  
Supplemental Figure 1B cont'd

**H358**

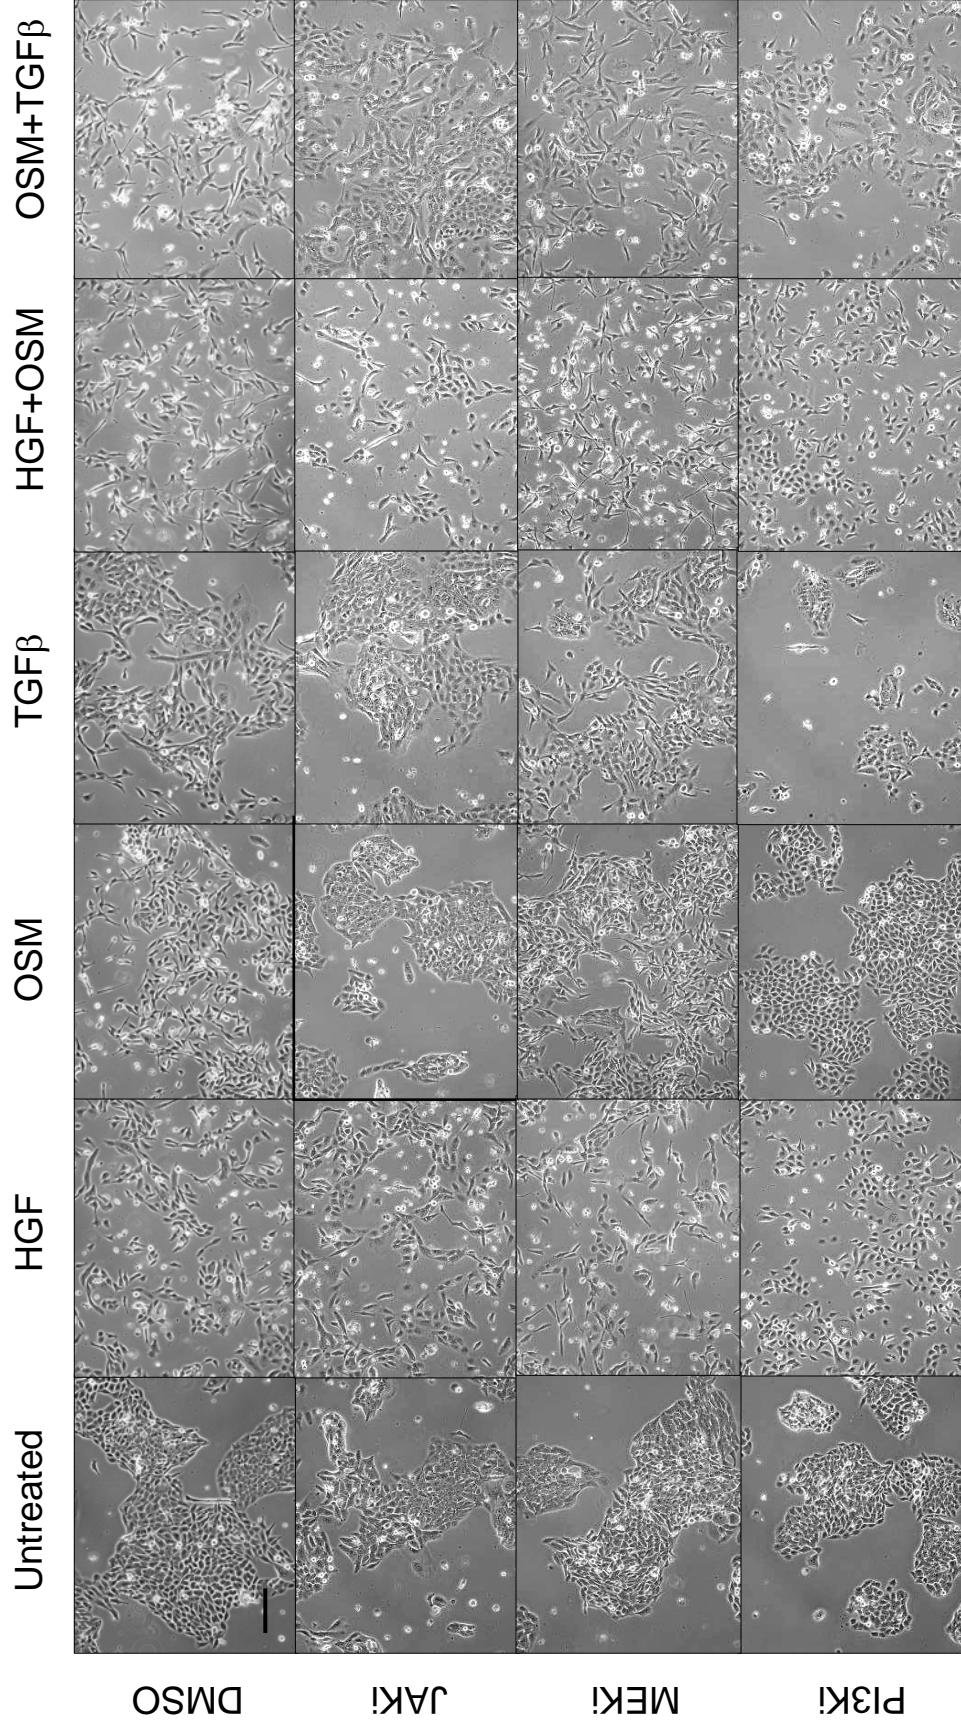

Argast et al.  
Supplemental Figure 1B cont'd

**H1650**

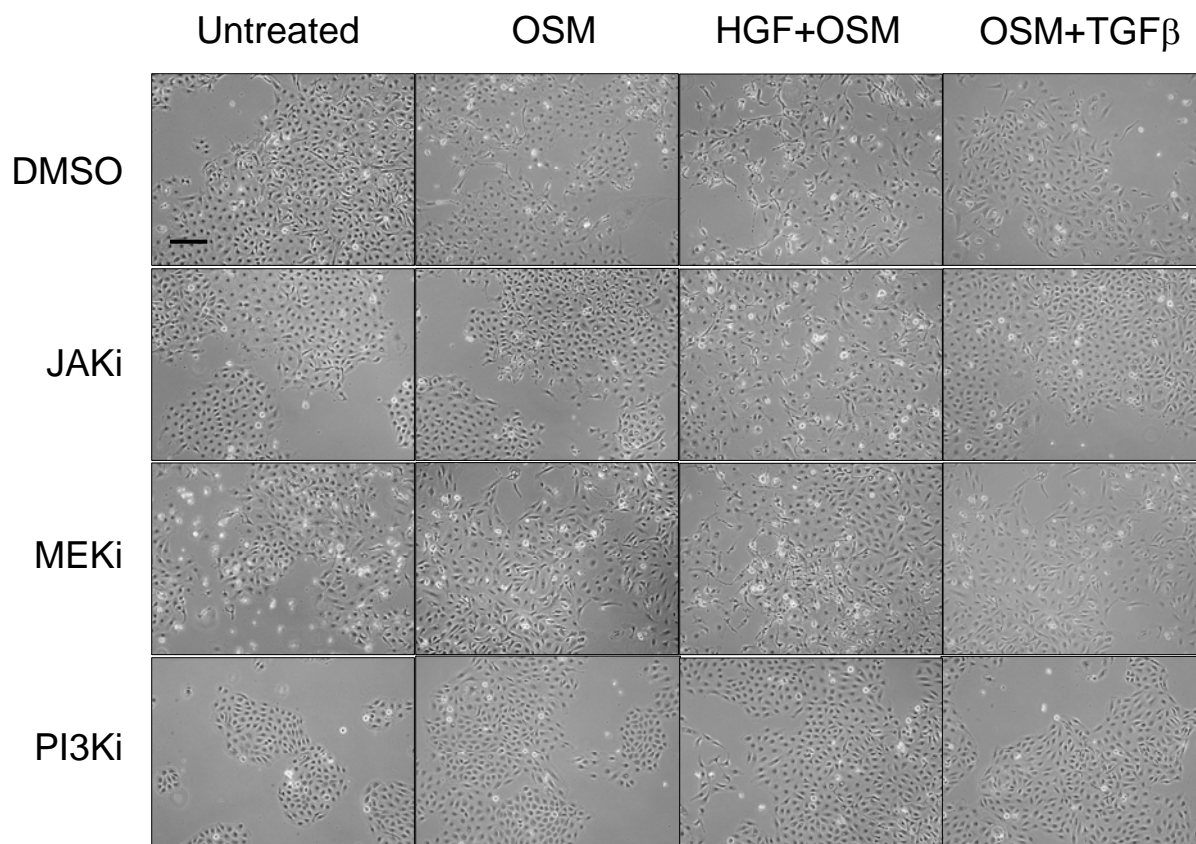

Argast et al.  
Supplemental figure 2A

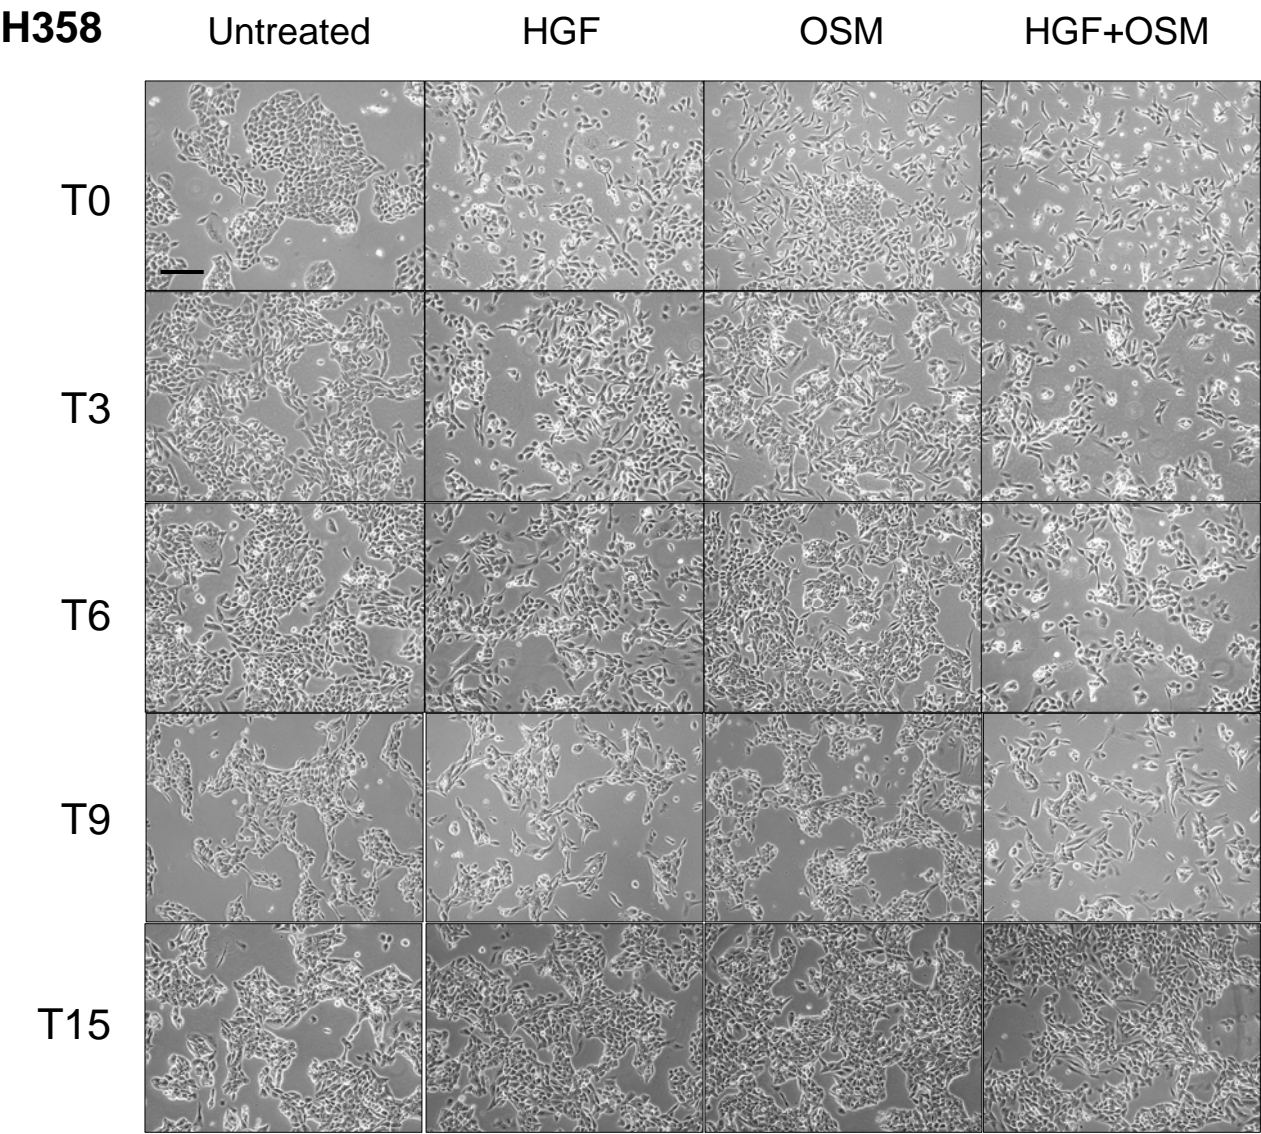



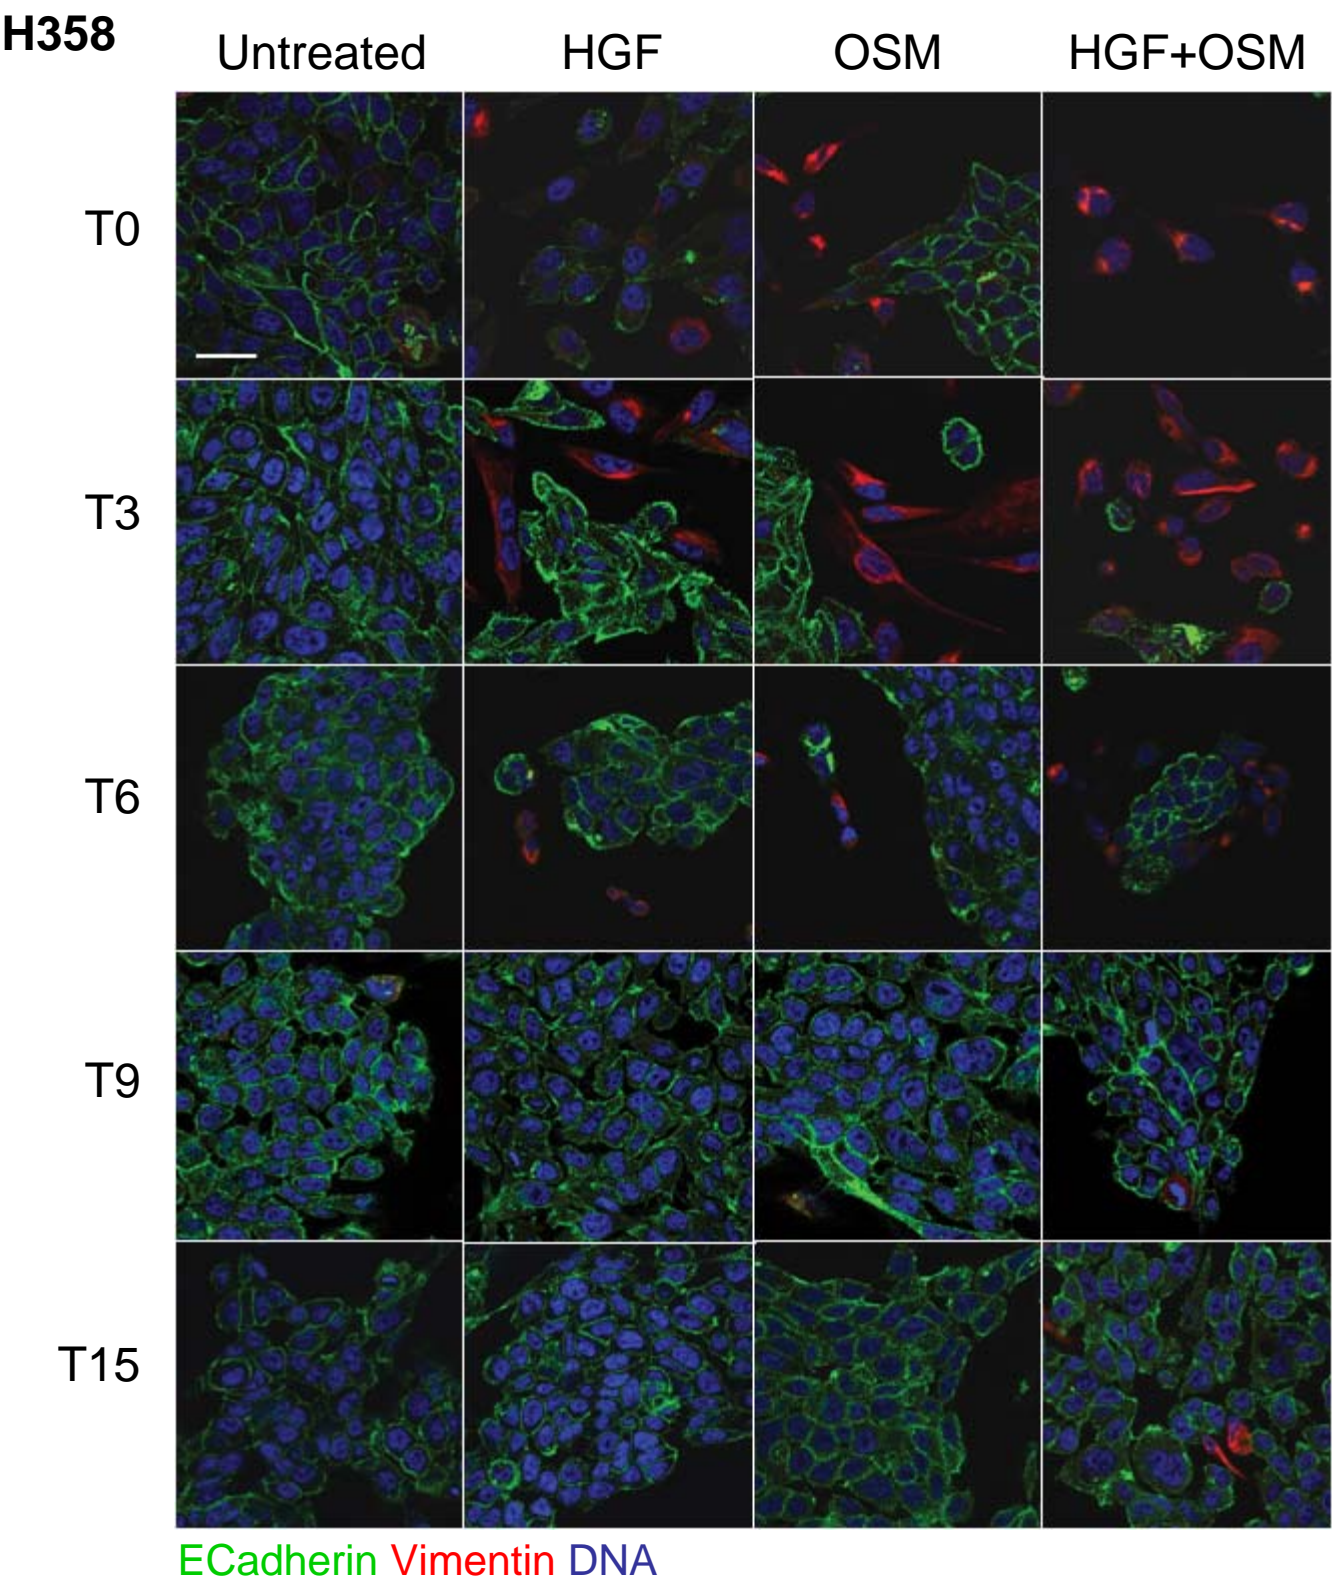

**CFPAC1**

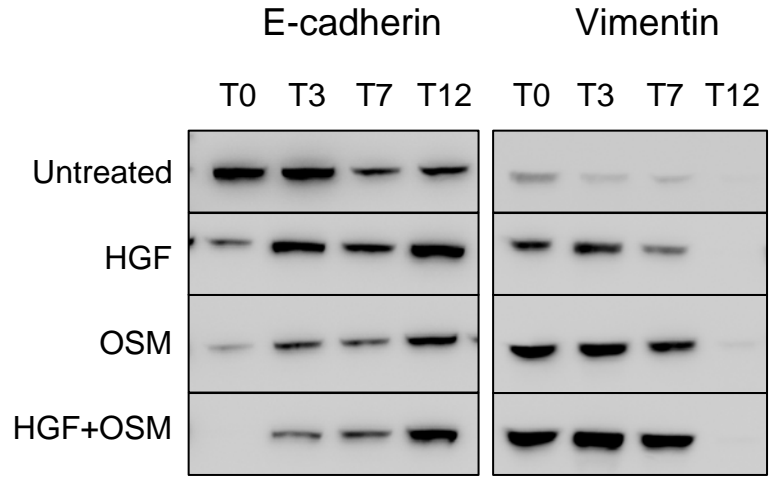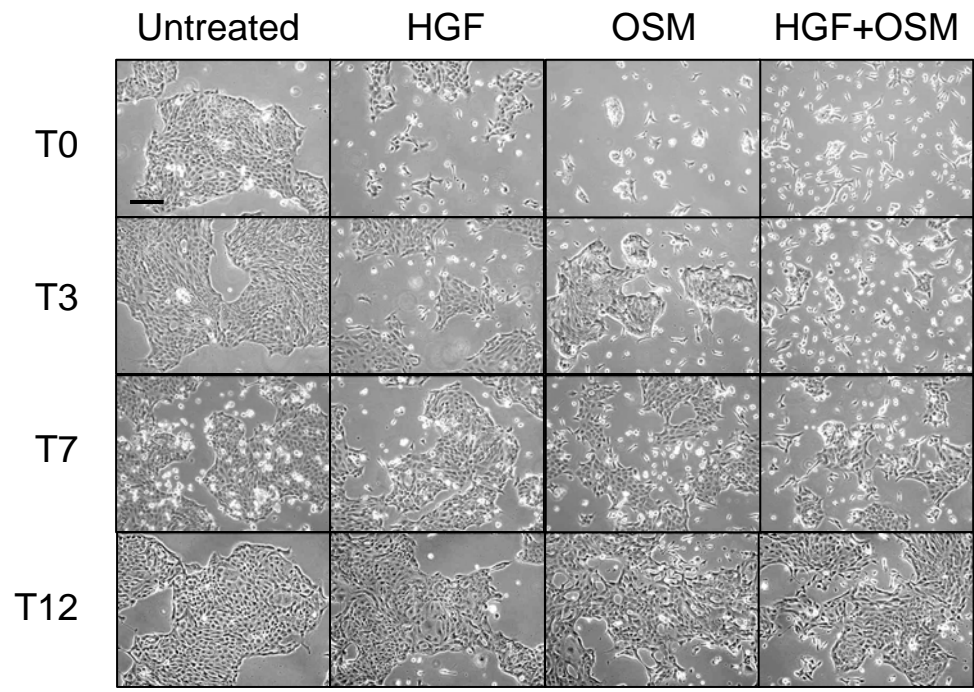

# H1650

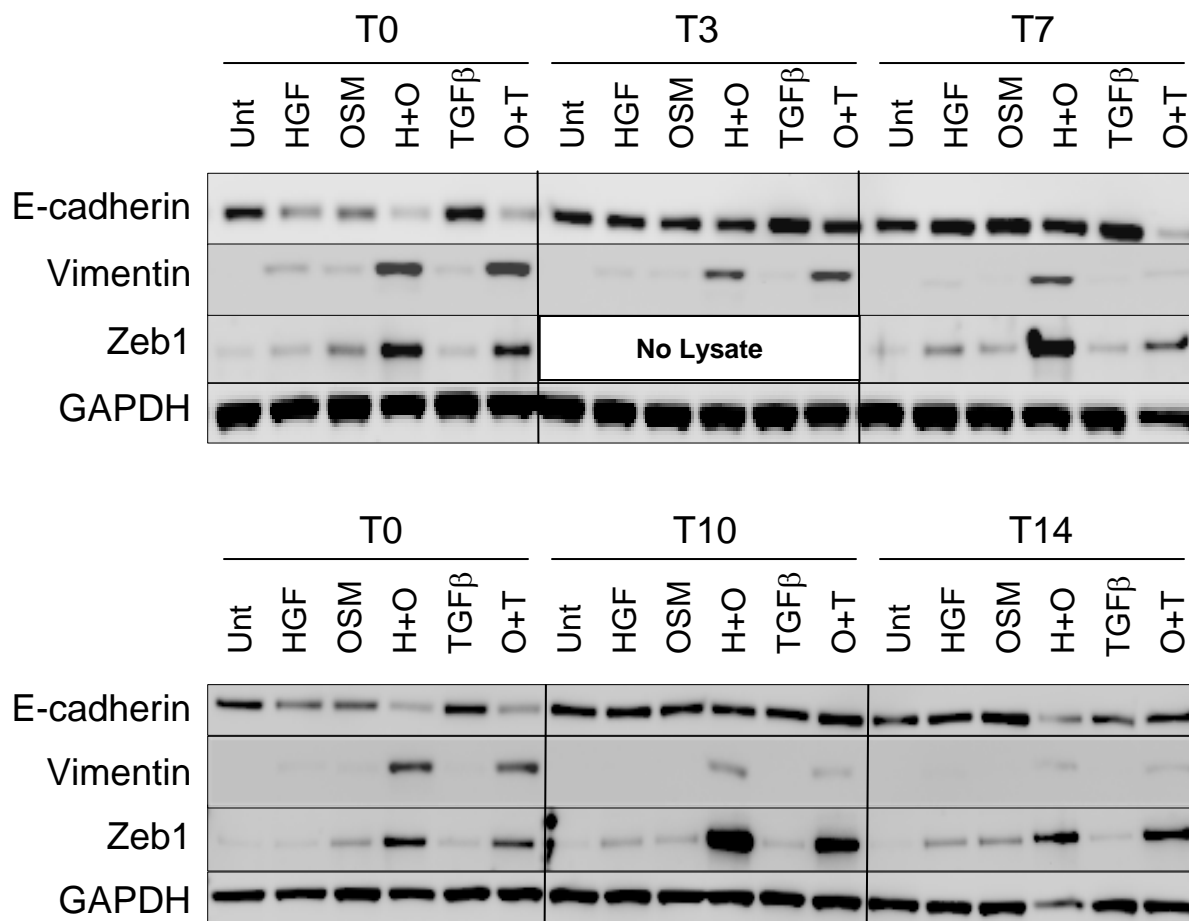



## H1650

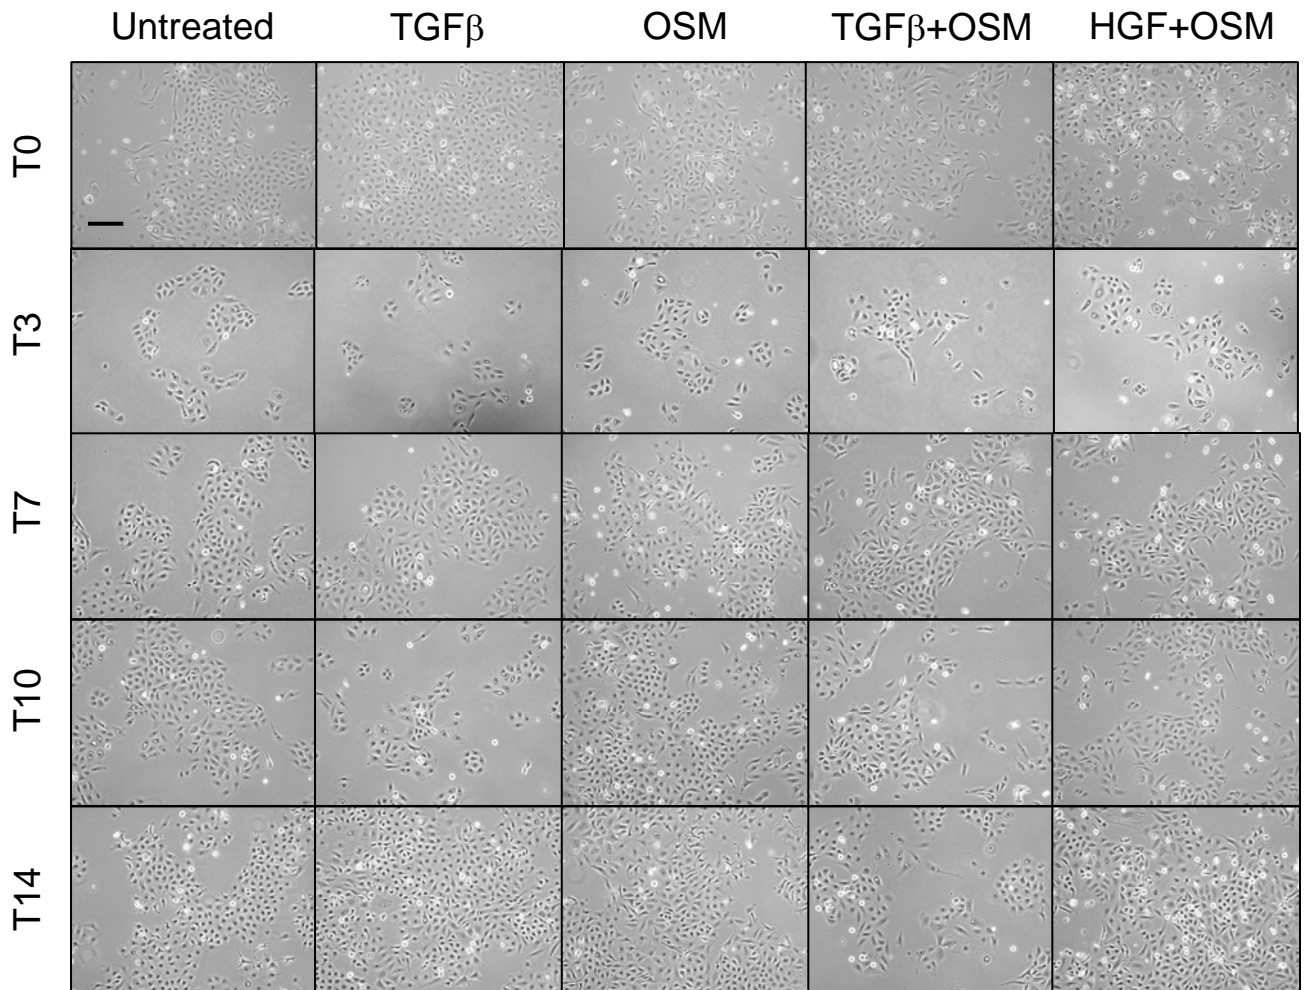

Supplement: Supplementary file 3 [file 1]
